# Supplementary material
Source: PubMed Central journal article supplement (PMC4033639)
Supplement: ac5007798_si_001.pdf [file ac5007798_si_001.pdf]

## Supporting Information

# An acoustofluidic micromixer via bubble inception and cavitation from microchannel sidewalls

*Adem Ozcelik,<sup>a</sup> Daniel Ahmed,<sup>a</sup> Yuliang Xie,<sup>a,b</sup> Nitesh Nama,<sup>a</sup> Zhiguo Qu,<sup>c</sup> Ahmad Ahsan Nawaz,<sup>b</sup> and Tony Jun Huang<sup>\*a,b</sup>*

<sup>a</sup>Department of Engineering Science and Mechanics, The Pennsylvania State University, University Park, Pennsylvania 16802, USA. Tel: 814-863-4209; Fax: 814-865-9974; E-mail: junhuang@psu.edu

<sup>b</sup>Department of Chemical Engineering, The Pennsylvania State University, University Park, PA 16802, USA.

<sup>c</sup>MOE Key Laboratory of Thermal Fluid Science and Engineering, School of Energy and Power Engineering, Xi'an Jiaotong University, Xi'an, Shaanxi, 710049, P.R. China.

### **\*Corresponding Author**

E-mail: junhuang@psu.edu

Fax: 814-865-9974; Tel: 814-863-4209

## **Mixing performance in the x-z plane**

We characterize mixing performance of the acoustofluidic micromixer along the z-direction. For these experiments, the PEG solution with a viscosity 65.3 mPa.s was injected from inlet 2, and the PEG solution with a viscosity of 34.2 mPa.s was injected from inlet 1. Snapshots from the bottom, middle, and top planes were captured before and after the cavitation mixing started. The intensity profiles were plotted to prove homogenous mixing along the z-direction in the channel (Fig. S-1).

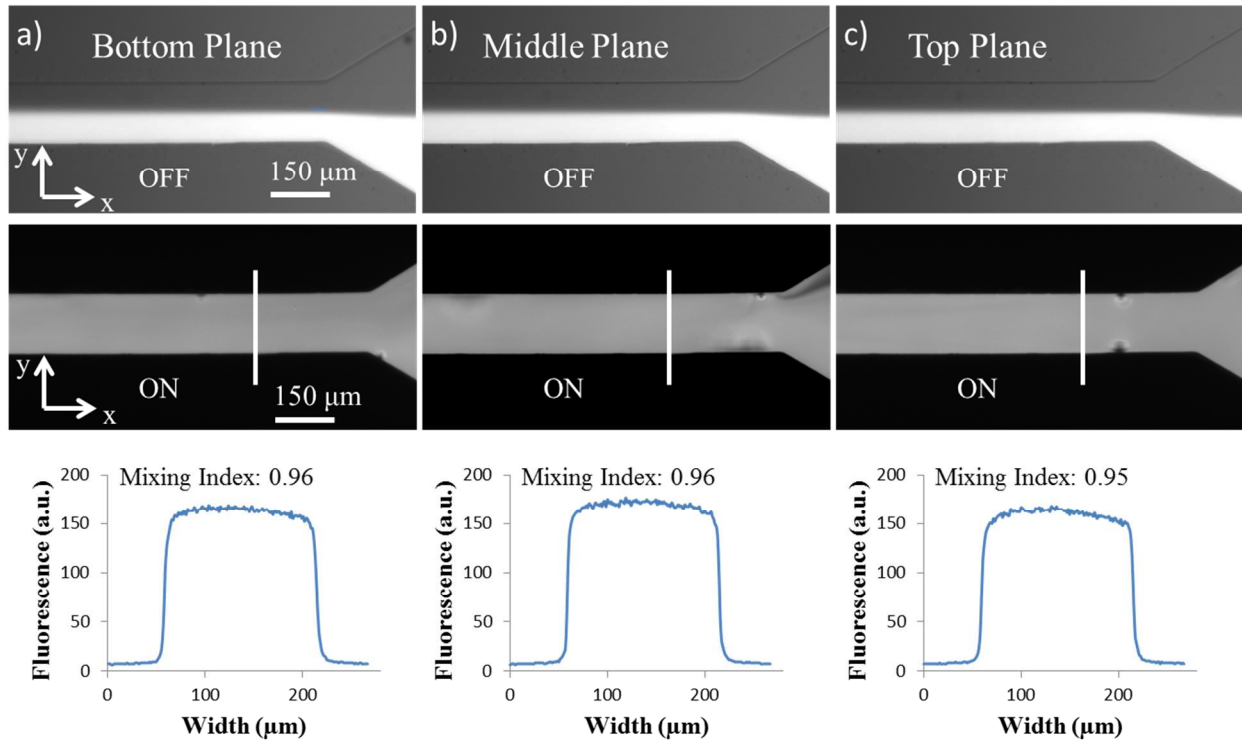

Figure S-1. Mixing homogeneity along the z-axis. PEG solution with a viscosity 65.3 mPa.s was injected from inlet 2, and the PEG solution with a viscosity of 34.2 mPa.s was injected from inlet 1. The top panel shows the laminar flow of the fluids in the a) bottom, b) middle, and c) top planes of the microfluidic channel (when the piezoelectric transducer was off). The middle panel shows the mixed state of the fluids with the bubble inception and cavitations from the sidewall (when the piezoelectric transducer was on). The bottom panel shows the fluorescent intensity profiles along the white line in the middle panel along with the calculated mixing indexes.
